# Supplementary material for: Where are my nematodes? Labelling and visualising entomopathogenic nematodes In Vivo using carbon quantum dots
Source: Research Square preprint supplement (doi:10.21203/rs.3.rs-5661578/v1), 2024-12-19
Supplement: Supplementary file 1 [file 2f6750c23846e6dc63327328.pdf]

### Supplementary material

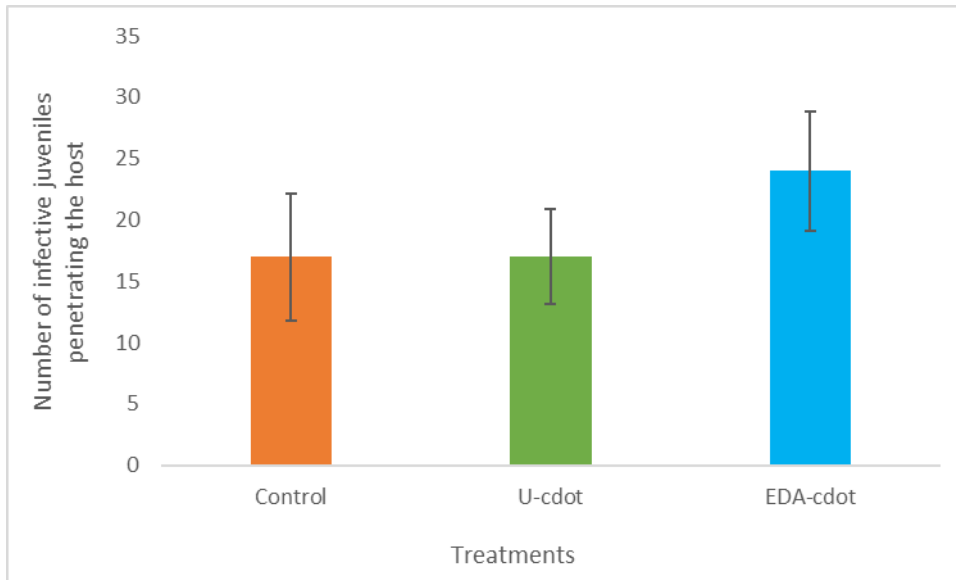

**Supplementary Figure 1:** number of infective juveniles (median) capable to penetrate *Galleria mellonella* larvae from an infection trial using the offspring produced by nematodes labelled with C-dots, no differences were found between treatments (Laverne's test for medians  $F_{(2,42)} = 0.44$ ,  $p = 0.65$ ,  $\alpha = 0.05$ )

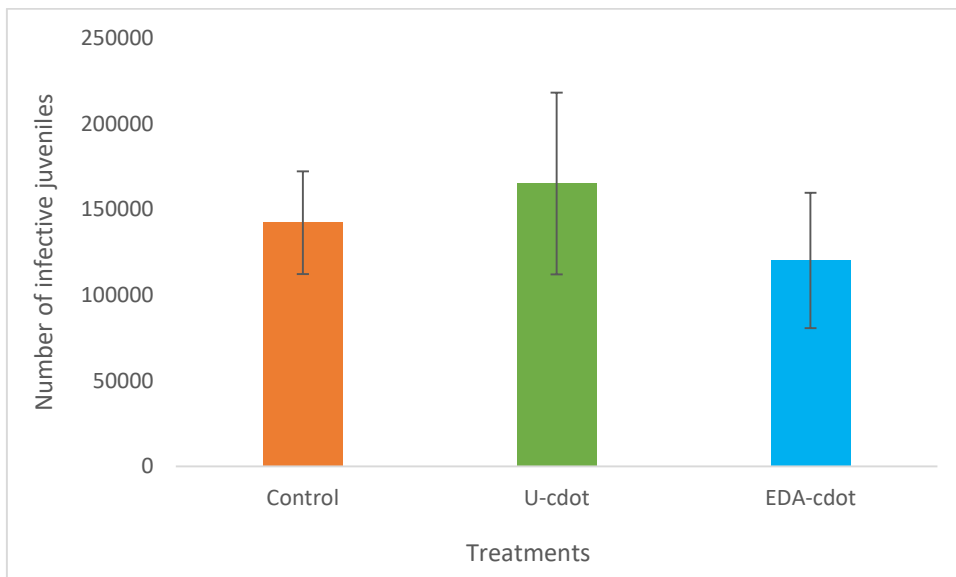

**Supplementary Figure 2:** number of new infective juveniles from an infection trial using the offspring produced by nematodes labelled with C-dots, no differences were found between treatments (ANOVA  $F_{(2,42)} = 0.56$ ,  $p = 0.59$ ,  $\alpha = 0.05$ )

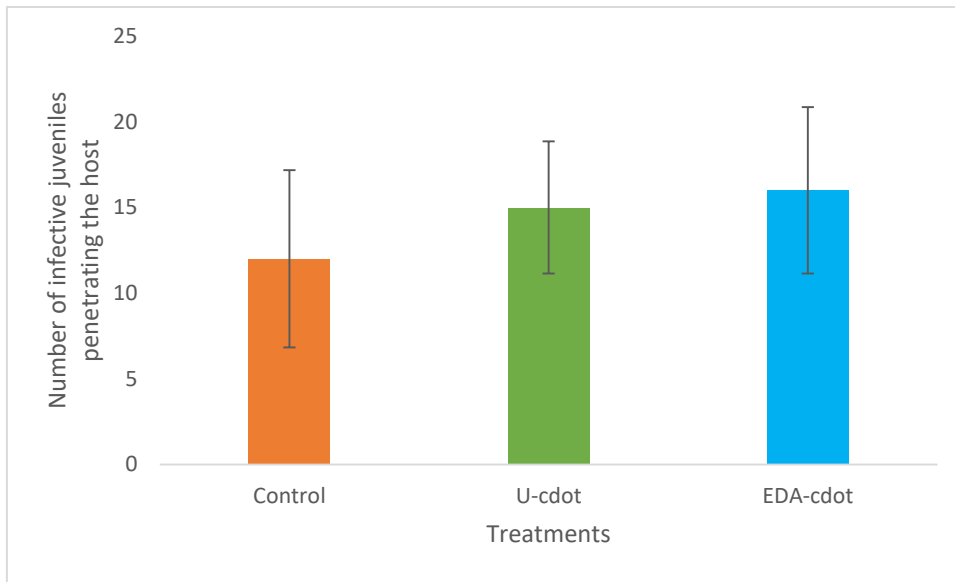

**Supplementary Figure 3:** number of infective juveniles (median) capable to penetrate *Galleria mellonella* larvae from an infection trial using nematodes soaked in C-dots suspension for 6 months, no differences were found between treatments (Laverne's test for medians  $F_{(2,42)} = 0.24$ ,  $p = 0.79$ ,  $\alpha = 0.05$ )

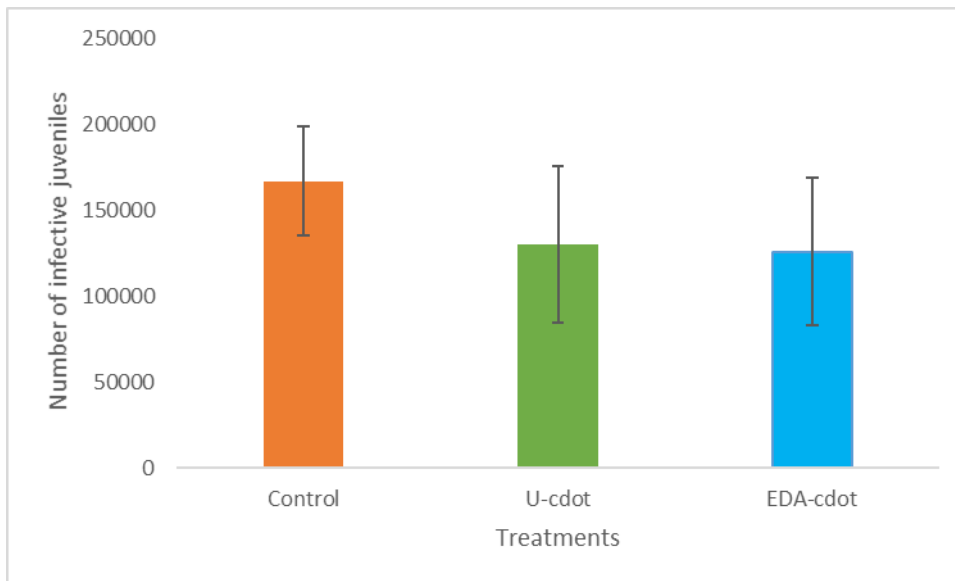

**Supplementary Figure 4:** number of new infective juveniles from an infection trial using nematodes soaked in C-dots solution for 6 months, no differences were found between treatments (ANOVA  $F_{(2,42)} = 1.86$ ,  $p = 0.17$ ,  $\alpha = 0.05$ )

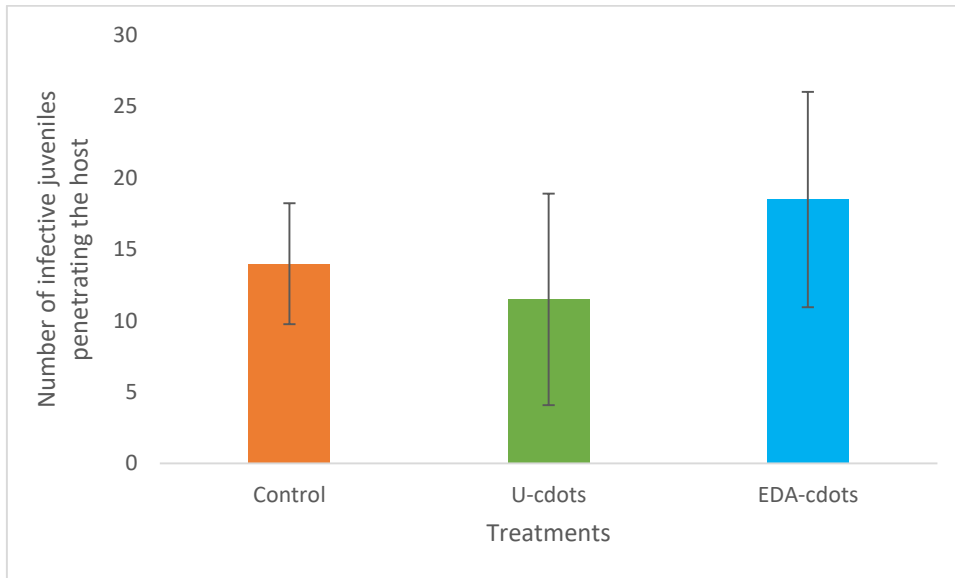

**Supplementary Figure 5:** number of infective juveniles (median) capable to penetrate *Galleria mellonella* larvae from an infection trial using nematodes soaked in C-dots suspension for 12 months, no differences were found between treatments (Laverne's test for medians  $F_{(2,42)} = 0.35$ ,  $p = 0.71$ ,  $\alpha = 0.05$ )

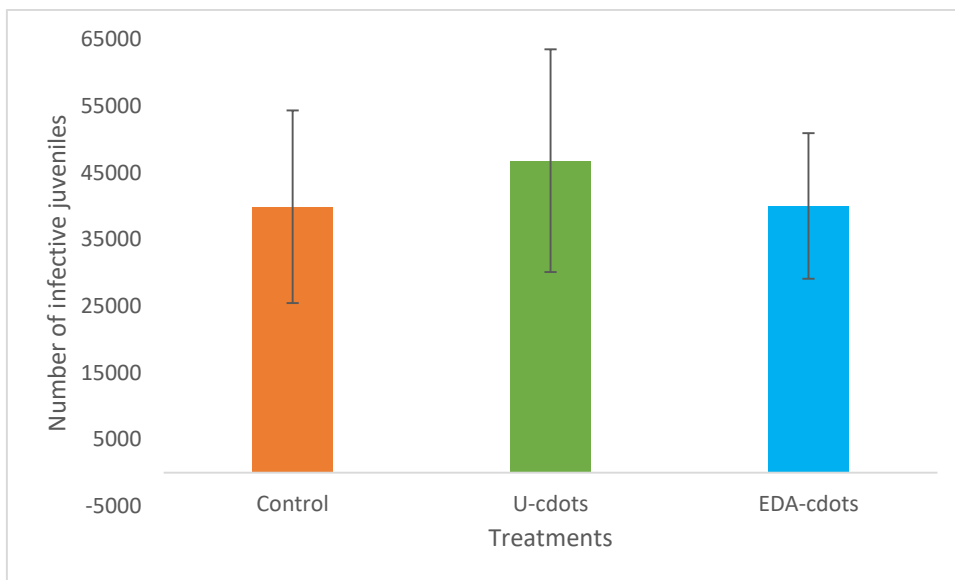

**Supplementary Figure 6:** number of new infective juveniles from an infection trial using nematodes soaked in C-dots solution for 12 months, no differences were found between treatments (ANOVA  $F_{(2,42)} = 0.37$ ,  $p = 0.7$ ,  $\alpha = 0.05$ )

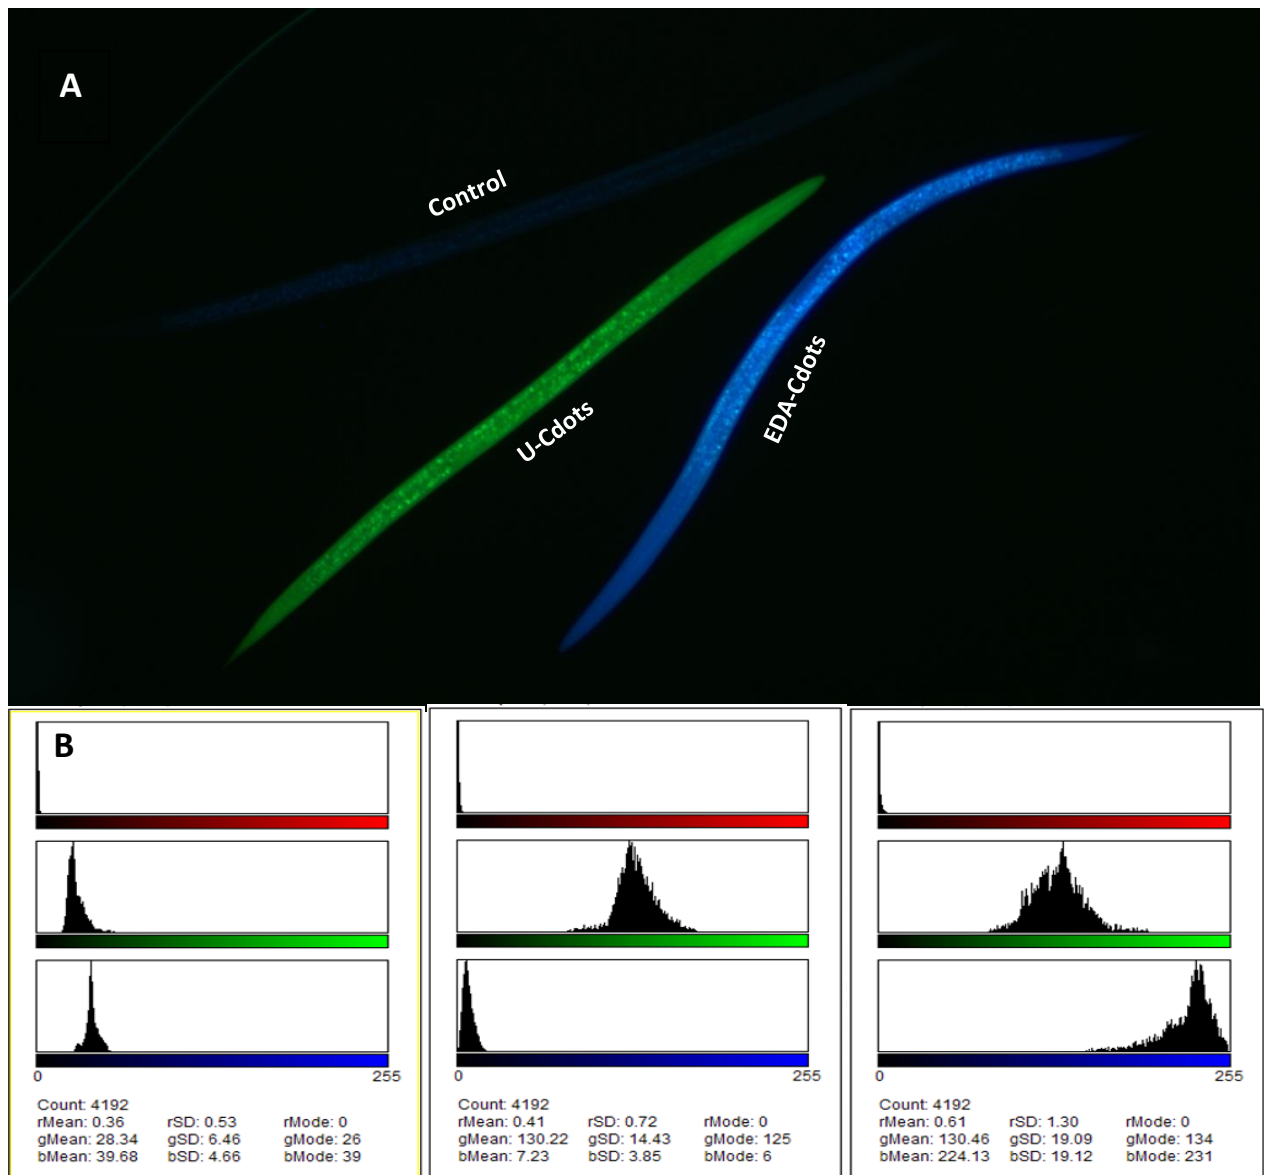

**Supplementary Figure 7: A)** Infective juveniles of *Steinernema feltiae* from the three treatments in the same glass slide **B)** RGB colour composition (histograms) of the infective juveniles of *Steinernema feltiae* from control (left panel), U-Cdots (central panel) and EDA-Cdots (right panel)

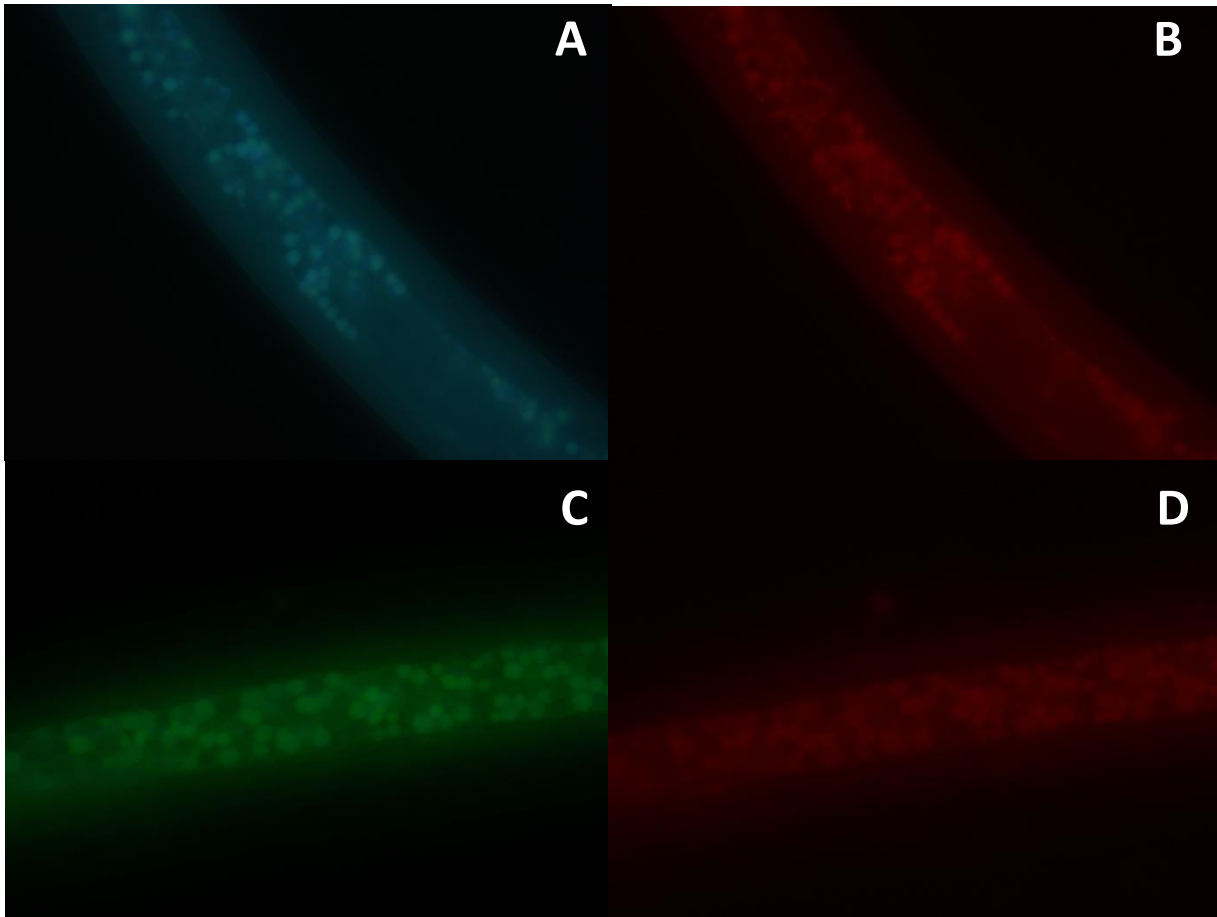

**Supplementary Figure 8:** Raw pictures of the colocalization of C-dots and Lysotracker™ deep red in the lysosome-related organelles of infective juveniles of *Steinernema feltiae* A) Strain UOH-010 labelled with EDA-Cdots under UV light or B) green filter (Texas red), C) Strain UOH-011 labelled with U-Cdots under UV light or D) green filter (Texas red). All pictures are under 1000X of magnification.
